# Supplementary material
Source: PubMed Central journal article supplement (PMC10621668)
Supplement: NIHMS1934527-supplement-Supp__Material.pdf [file NIHMS1934527-supplement-Supp__Material.pdf]

**Appendix**  
**Life Expectancy and Built Environments in the U.S.: A Multi-Level Analysis**  
**Kim et al.**

**Appendix Table 1.** Multi-level\* regression model results without covariate adjustment. High- and low-density urban areas

|                                       | High density urban (n=15,120) |                       | Low density urban (n=23,480) |                       |
|---------------------------------------|-------------------------------|-----------------------|------------------------------|-----------------------|
|                                       | beta                          | 95% CI                | beta                         | 95% CI                |
| Limited healthy food (z) <sup>a</sup> | -0.20                         | <b>(-0.27, -0.13)</b> | -0.11                        | <b>(-0.15, -0.07)</b> |
| Liquor store/1000 (z)                 | 0.00                          | (-0.06, 0.07)         | -0.01                        | (-0.05, 0.03)         |
| Tobacco store/1000 (z)                | 0.03                          | (-0.04, 0.09)         | -0.02                        | (-0.06, 0.01)         |
| Convenience store/1000 (z)            | -0.14                         | <b>(-0.21, -0.08)</b> | -0.27                        | <b>(-0.31, -0.23)</b> |
| Gas station/1000 (z)                  | -0.01                         | (-0.07, 0.05)         | -0.06                        | <b>(-0.09, -0.02)</b> |
| Fast-food/1000 (z)                    | -0.05                         | (-0.13, 0.02)         | -0.01                        | (-0.05, 0.03)         |
| Bar/1000 (z)                          | -0.05                         | (-0.13, 0.03)         | -0.09                        | <b>(-0.13, -0.05)</b> |
| Intersection Density (z)              | 0.08                          | <b>(0.01, 0.15)</b>   | 0.01                         | (-0.02, 0.05)         |
| Transit stop coverage (z)             | 0.29                          | <b>(0.2, 0.37)</b>    | 0.15                         | <b>(0.11, 0.19)</b>   |
| Count of open park (z)                | 0.14                          | <b>(0.07, 0.21)</b>   | 0.17                         | <b>(0.13, 0.2)</b>    |
| Percent green space (z)               | 0.34                          | <b>(0.25, 0.42)</b>   | 0.11                         | <b>(0.06, 0.17)</b>   |
| CO (z)                                | 0.14                          | (0, 0.28)             | -0.06                        | (-0.11, 0)            |
| NO2 (z)                               | 0.61                          | <b>(0.42, 0.81)</b>   | 0.19                         | <b>(0.11, 0.28)</b>   |
| O3 (z)                                | 0.08                          | (-0.14, 0.31)         | -0.02                        | (-0.18, 0.13)         |
| PM10 (z)                              | -0.43                         | <b>(-0.59, -0.27)</b> | -0.36                        | <b>(-0.46, -0.26)</b> |
| PM2.5 (z)                             | -0.09                         | (-0.3, 0.12)          | 0.12                         | (-0.01, 0.25)         |
| SO2 (z)                               | -0.45                         | <b>(-0.61, -0.29)</b> | -0.61                        | <b>(-0.69, -0.53)</b> |
| Renter (z)                            | -0.53                         | <b>(-0.65, -0.42)</b> | -0.31                        | <b>(-0.38, -0.25)</b> |
| House pre-1979 (z)                    | -0.14                         | <b>(-0.22, -0.07)</b> | -0.44                        | <b>(-0.49, -0.39)</b> |
| Crowding (z)                          | -0.23                         | <b>(-0.34, -0.13)</b> | -0.30                        | <b>(-0.35, -0.25)</b> |
| Excessive housing cost (z)            | -0.57                         | <b>(-0.67, -0.48)</b> | -0.56                        | <b>(-0.61, -0.5)</b>  |
| Null-model ICC                        | 0.411                         |                       | 0.355                        |                       |
| Conditional ICC                       | 0.162                         |                       | 0.167                        |                       |
| Marginal R <sup>2</sup>               | 0.407                         |                       | 0.430                        |                       |
| Conditional R <sup>2</sup>            | 0.569                         |                       | 0.597                        |                       |

\* Four hierarchical geographic boundaries, county, state, census division, and region were included as random effects. Multivariable models adjusted for age groups, unemployment rate, proportion of foreign-born residents, and proportions of households with children and without vehicles. <sup>a</sup> ½ mile buffer for high density urban areas, 1 mile for low density urban areas. <sup>a</sup> R<sub>s</sub> were calculated from Pearson correlation test. Bold indicates p-value less than 0.05 in multivariable models

**Appendix**  
**Life Expectancy and Built Environments in the U.S.: A Multi-Level Analysis**  
**Kim et al.**

**Appendix Table 2.** Multi-level\* regression model results without covariate adjustment. Suburban/small town and rural areas

|                                       | Suburban/small town (n=10,680) |                       | Rural (n=15,952) |                       |
|---------------------------------------|--------------------------------|-----------------------|------------------|-----------------------|
|                                       | beta                           | 95% CI                | beta             | 95% CI                |
| Limited healthy food (z) <sup>a</sup> | -0.06                          | (-0.12, 0)            | 0.19             | <b>(0.14, 0.24)</b>   |
| Liquor store/1000 (z)                 | 0.04                           | (-0.01, 0.1)          | 0.02             | (-0.03, 0.06)         |
| Tobacco store/1000 (z)                | -0.04                          | (-0.09, 0.01)         | -0.06            | <b>(-0.1, -0.01)</b>  |
| Convenience store/1000 (z)            | -0.27                          | <b>(-0.33, -0.22)</b> | -0.19            | <b>(-0.23, -0.14)</b> |
| Gas station/1000 (z)                  | -0.02                          | (-0.07, 0.03)         | 0.01             | (-0.03, 0.05)         |
| Fast-food/1000 (z)                    | -0.09                          | <b>(-0.14, -0.03)</b> | -0.02            | (-0.07, 0.02)         |
| Bar/1000 (z)                          | -0.09                          | <b>(-0.15, -0.04)</b> | -0.02            | (-0.06, 0.03)         |
| Intersection Density (z)              | -0.06                          | (-0.13, 0)            | -0.24            | <b>(-0.29, -0.19)</b> |
| Transit stop coverage (z)             | 0.05                           | (0, 0.1)              | 0.00             | (-0.04, 0.05)         |
| Count of open park (z)                | 0.24                           | <b>(0.18, 0.29)</b>   | 0.10             | <b>(0.05, 0.15)</b>   |
| Percent green space (z)               | 0.10                           | <b>(0.02, 0.18)</b>   | -0.19            | <b>(-0.27, -0.11)</b> |
| CO (z)                                | -0.11                          | <b>(-0.18, -0.04)</b> | -0.11            | <b>(-0.18, -0.03)</b> |
| NO2 (z)                               | 0.14                           | <b>(0.05, 0.24)</b>   | 0.22             | <b>(0.12, 0.31)</b>   |
| O3 (z)                                | -0.10                          | <b>(-0.24, 0.03)</b>  | 0.04             | (-0.06, 0.15)         |
| PM10 (z)                              | -0.12                          | (-0.23, 0)            | -0.07            | (-0.18, 0.05)         |
| PM2.5 (z)                             | -0.08                          | (-0.23, 0.07)         | -0.50            | <b>(-0.64, -0.37)</b> |
| SO2 (z)                               | -0.37                          | <b>(-0.47, -0.27)</b> | -0.24            | <b>(-0.32, -0.15)</b> |
| Renter (z)                            | -0.45                          | <b>(-0.54, -0.35)</b> | -0.46            | <b>(-0.53, -0.39)</b> |
| House pre-1979 (z)                    | -0.73                          | <b>(-0.81, -0.65)</b> | -0.34            | <b>(-0.4, -0.27)</b>  |
| Crowding (z)                          | -0.33                          | <b>(-0.4, -0.26)</b>  | -0.11            | (-0.17, -0.05)        |
| Excessive housing cost (z)            | -0.28                          | <b>(-0.35, -0.21)</b> | -0.17            | <b>(-0.23, -0.11)</b> |
| Null-model ICC                        | 0.466                          |                       | 0.449            |                       |
| Conditional ICC                       | 0.188                          |                       | 0.292            |                       |
| Marginal R <sup>2</sup>               | 0.399                          |                       | 0.196            |                       |
| Conditional R <sup>2</sup>            | 0.587                          |                       | 0.488            |                       |

\* Four hierarchical geographic boundaries, county, state, census division, and region were included as random effects. Multivariable models adjusted for age groups, unemployment rate, proportion of foreign-born residents, and proportions of households with children and without vehicles. <sup>a</sup> ½ mile buffer for high density urban areas, 1 mile for low density urban areas. <sup>a</sup> R<sub>s</sub> were calculated from Pearson correlation test. Bold indicates p-value less than 0.05 in multivariable models
